# Supplementary material for: A Novel Red-Emitting NaYS2 Phosphor Under 1550 nm Excitation
Source: Preprints.org preprint supplement (doi:10.20944/preprints202311.1596.v1), 2023-11-25
Supplement: Supplementary file 1 [file supplementary]

**Supplementary Materials**

A Novel Red-Emitting NaYS2 Phosphor under 1550 nm Excitation

Jiulong Wu, Ying Tian*, Limin Wei, Ke Cai, Xixian Luo, Hong Wang*

|  |
| --- |

School of Science, Dalian Maritime University, Dalian 116026, China

**
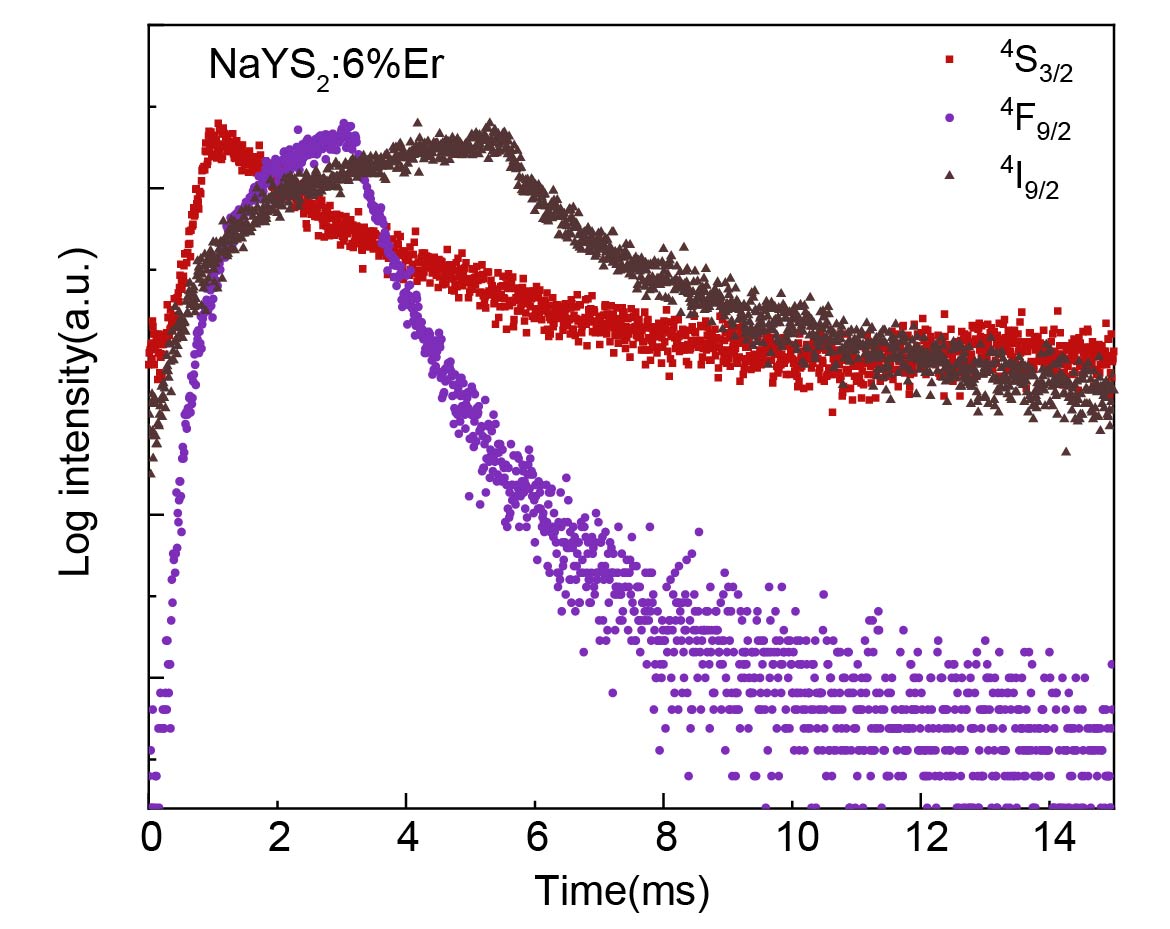
**

**Figure S1.** Fluoresce decay dynamics of 4S3/2 (555 nm), 4F9/2 (655 nm), 4I9/2 (800 nm) energy levels of Er3+ ions in NaYS2:6%Er3+.
